# Supplementary material for: The functional genome of CA1 and CA3 neurons under native conditions and in response to ischemia
Source: PubMed Central journal article supplement (PMC2194787; doi:10.1186/1471-2164-8-370), 2007-10-15

**A**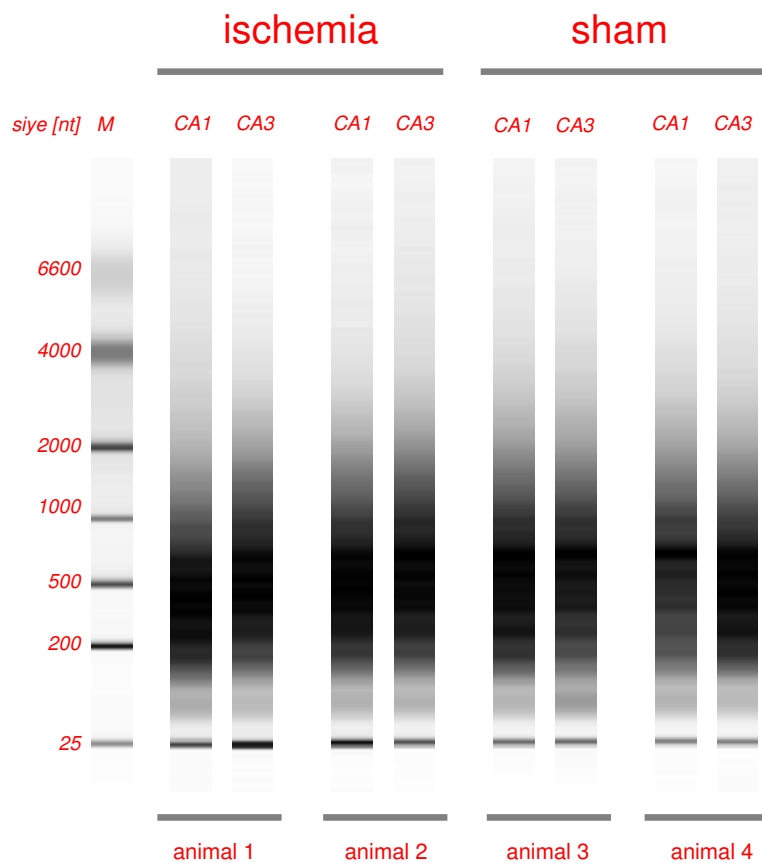**B**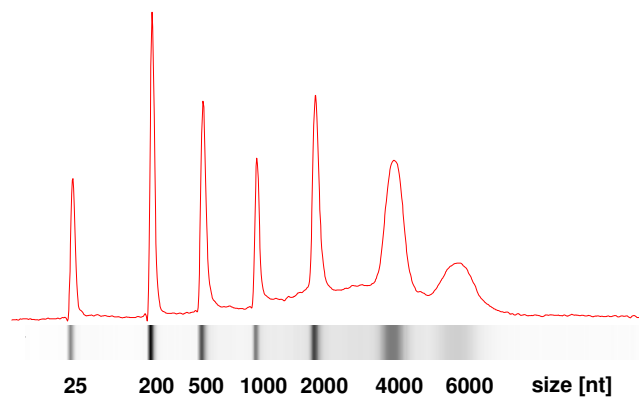**C**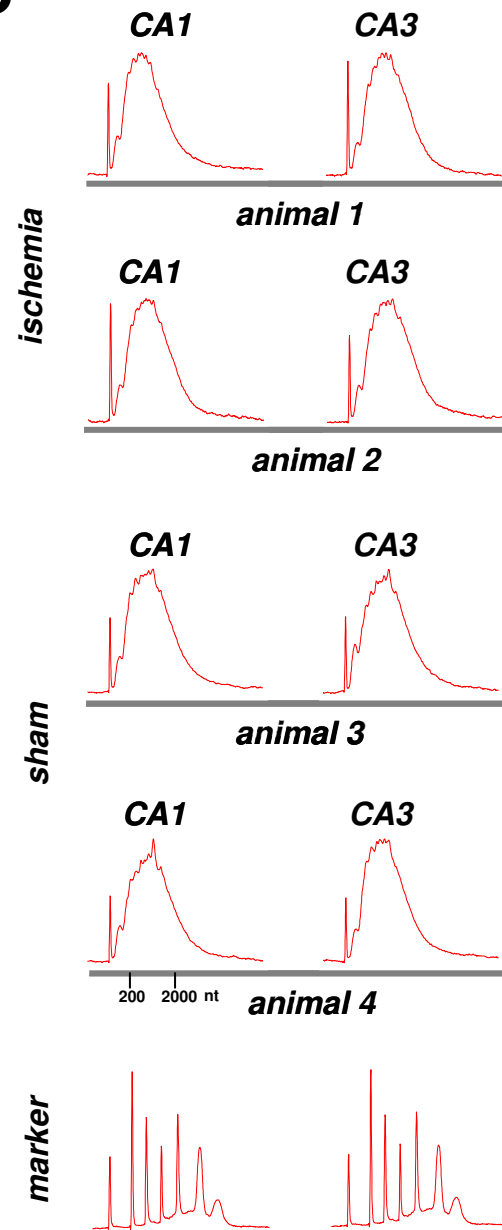

Supplement: 1471-2164-8-370-S1.pdf [file 1471-2164-8-370-S1.pdf]
