# Supplementary material for: The functional genome of CA1 and CA3 neurons under native conditions and in response to ischemia
Source: PubMed Central journal article supplement (PMC2194787; doi:10.1186/1471-2164-8-370), 2007-10-15
Supplement: 1471-2164-8-370-S7.pdf [file 1471-2164-8-370-S7.pdf]

|                            | <b>Accession#</b> | <b>gene name</b>                                      | <b>Array</b> | <b>qPCR</b> |
|----------------------------|-------------------|-------------------------------------------------------|--------------|-------------|
| <b>CA3 vs CA1<br/>sham</b> | NM_009788         | Calbindin 28K (Calb1)                                 | 0.07         | 0.08 ± 0.01 |
|                            | NM_181988         | RAS-like, estrogen-regulated, growth-inhibitor (Rerg) | 21.49        | 4.94 ± 0.35 |
|                            | NM_008731         | Neuropeptide Y receptor Y2 (Npy2r)                    | 5.78         | 1.76 ± 0.32 |
| <b>CA3 vs CA1<br/>isch</b> | NM_011255         | Retinol binding protein 4 (Rbp4)                      | 0.18         | 0.29 ± 0.01 |
|                            | NM_013757         | Synaptotagmin-like 4 (Syt14)                          | 7.12         | 3.53 ± 0.81 |
|                            | NM_021543         | Protocadherin 8 (Pcdh8)                               | 5.14         | 5.21 ± 1.25 |
|                            | NM_153529         | Neuritin 1 (Nrn1)                                     | 2.60         | 2.03 ± 0.87 |
|                            | NM_145584         | Spondin 1 (Spon1)                                     | 0.22         | 0.32 ± 0.17 |
